## CORRESPONDENCE

**Terrance A. Yemen, M.D.**  
Head  
Department of Anesthesia  
Montreal Children's Hospital  
Associate Professor of Anesthesia

McGill University  
Montreal, Quebec  
Canada

(Accepted for publication March 4, 1998.)

Anesthesiology  
1998; 89:272  
© 1998 American Society of Anesthesiologists, Inc.  
Lippincott-Raven Publishers

*In Reply:*—We thank Dr. Yemen for his interest in our publication. Our adult patients have not experienced the episodes of "coughing" associated with the administration of sufentanil that he describes in children. The literature on opioid-induced difficult ventilation in neonates and children is at best confused and consists mostly of isolated case reports.

Baraka<sup>1</sup> described post-extubation laryngospasm after opioid-based anesthesia in a 4-yr-old child. Naloxone terminated the laryngospasm. MacGregor *et al.*<sup>2</sup> described difficult ventilation after initiation of a fentanyl infusion in an intubated neonate. They extubated the child, fearing an endotracheal tube obstruction. They could not ventilate the extubated child. A cardiorespiratory arrest resulted. Naloxone was administered and restored the ability to ventilate. They ascribed the difficult ventilation to chest wall rigidity.

Perhaps the chest wall component plays a larger role in causing difficult ventilation in infants and children than in adults. The only way to clarify the issue is to conduct a prospective study in children similar to that done in adults.<sup>3</sup>

**Joel A. Bennett, D.D.S., M.D.**  
Associate Professor of Anesthesiology  
Department of Anesthesiology  
Allegheny University of the Health Sciences

Broad and Vine  
Philadelphia, Pennsylvania  
**Jonathan Abrams, M.D.**  
Attending Anesthesiologist  
Lankenau Hospital  
**Daniel F. Van Riper, M.D.**  
Associate Professor of Anesthesiology  
**Jan C. Horrow, M.D.**  
Professor of Anesthesiology

## References

1. Baraka A: Fentanyl-induced laryngospasm following tracheal extubation in a child. *Anesthesia* 1995; 50:375
2. MacGregor DA, Bauman LA: Chest wall rigidity during infusion of fentanyl in a two-month-old infant after heart surgery. *J Clin Anesth* 1996; 8:251-4
3. Bennett JA, Abrams JT, Van Riper DF, Horrow JC: Difficult or impossible ventilation after sufentanil induction of anesthesia is caused primarily by vocal cord closure. *ANESTHESIOLOGY* 1997; 87:1070-4

(Accepted for publication March 4, 1998.)

Anesthesiology  
1998; 89:272-3  
© 1998 American Society of Anesthesiologists, Inc.  
Lippincott-Raven Publishers

## Is Phenylephrine or Sodium Bisulfite Neurotoxic?

*To the Editor:*—We have read with interest the article by Sakura *et al.*,<sup>1</sup> in which they attributed the transient neurologic deficit seen in patients after spinal anesthesia to phenylephrine added to tetracaine solution. Regrettably the authors failed to acknowledge that the commercially available 0.5% phenylephrine solution (Kowa, Nagoya, Japan) contained 0.1% sodium bisulfite, well known for its neurotoxicity when administered neuraxially.<sup>2,3</sup> The amount of sodium bisulfite given in their patients ranged from 0.5 to 0.75 mg, approximately half the dose that caused permanent hind-limb paralysis in rabbits<sup>2</sup> and approximately one tenth the concentration that caused irreversible spinal monosynaptic reflex in rats.<sup>3</sup> Unless preservative-free

phenylephrine solution is used in combination with tetracaine, phenylephrine, *per se*, cannot be regarded as an etiology of the reported transient neurologic sequelae.

**Makoto Tanaka, M.D.**  
**Toshiaki Nishikawa, M.D.**  
Department of Anesthesia  
Akita University, School of Medicine  
Akita 010, Japan  
mtanaka@med.akita-u.ac.jp



## CORRESPONDENCE

## References

1. Sakura S, Sumi M, Sakaguchi Y, Saito Y, Kosaka Y, Drasner K: The addition of phenylephrine contributes to the development of transient neurologic symptoms after spinal anesthesia with 0.5% tetracaine. *ANESTHESIOLOGY* 1997; 87:771-8
2. Wang BC, Hillman DE, Spielholz NI, Turndorf H: Chronic neuro-

logical deficits and nesacaine-CE—an effect of the anesthetic, 2-chloroprocaine, or the antioxidant, sodium bisulfite? *Anesth Analg* 1984; 63:445-7

3. Hersh EV, Condouris GA, Havelin D: Actions of intrathecal chloroprocaine and sodium bisulfite on rat spinal reflex function utilizing a noninvasive technique. *ANESTHESIOLOGY* 1990; 72:1077-82

(Accepted for publication March 20, 1998.)

Anesthesiology  
1998; 89:273

© 1998 American Society of Anesthesiologists, Inc.  
Lippincott-Raven Publishers

## Transient Neurologic Symptoms when Phenylephrine Is Added to Tetracaine Spinal Anesthesia—An Alternative

*To the Editor:*—The article by Sakura *et al.* regarding transient neurologic symptoms after tetracaine spinal anesthesia with phenylephrine was informative.<sup>1</sup> Why do anesthesiologists add a vasoconstrictor to prolong the duration of the anesthesia? As the authors indicate, "Prolongation is thought to result, at least in part, from a decrease in nerve blood flow resulting in reduced vascular uptake of the local anesthetic."<sup>2</sup> Thus, more local anesthetic is available for neuronal penetration, causing a more profound and prolonged block. It also is implied that this allows the anesthesiologist to limit the amount of local anesthetic injected, in turn decreasing cephalad spread. But if the vascular absorption of the local anesthetic decreases, is not that the equivalent of injecting more local anesthetic? Because there is an apparent adverse effect of adding phenylephrine to tetracaine spinal anesthesia,<sup>1</sup> why not just inject a little more tetracaine to prolong the anesthesia and omit the phenylephrine?

The Editorial View that accompanied the Sakura paper was confusing.<sup>3</sup> Dr. Rowlingson agrees that Sakura *et al.*<sup>1</sup> have furthered our knowledge regarding transient neurologic symptoms after spinal anesthesia. He then goes a step further and states, "Perhaps tetracaine is a better (safer) drug for spinal anesthesia, because compared to lidocaine and bupivacaine it increases spinal cord blood flow." That conclusion, based on one dog study,<sup>2</sup> is a big leap. Tetracaine, like lidocaine, caused cauda equina syndrome after continuous spinal anesthesia,<sup>4-6</sup> and it is neurotoxic to isolated nerve.<sup>7</sup> Further, compared with bupivacaine, tetracaine is associated with a significantly higher incidence of tourniquet pain during lower extremity orthopedic operations.<sup>8</sup> It is for these reasons that I do not share or understand Dr. Rowlingson's enthusiasm for tetracaine spinal anesthesia.

**Donald H. Lambert, Ph.D., M.D.**  
Chief, Anesthesiology  
Associate Chief, Surgical Services  
Brockton-West Roxbury VAMC

West Roxbury, Massachusetts  
Associate Professor of Anaesthesia  
Harvard Medical School  
Boston, Massachusetts

## References

1. Sakura S, Sumi M, Sakaguchi Y, Kosaka Y, Drasner K: The addition of phenylephrine contributes to the development of transient neurologic symptoms after spinal anesthesia with 0.5% tetracaine. *ANESTHESIOLOGY* 1997; 87:771-8
2. Kozody R, Palahniuk RJ, Cumming MO: Spinal cord blood flow following subarachnoid tetracaine. *Can Anaesth Soc J* 1985; 32:23-9
3. Rowlingson JC: Transient neurologic symptoms. Now, with phenylephrine? *ANESTHESIOLOGY* 1997; 87:737-8
4. Nicholson M, Eversole U: Neurological complications of spinal anesthesia. *JAMA* 1946; 132:679-85
5. Rigler ML, Drasner K, Krejcie TC, Yelich SJ, Scholnick FT, De-Fontes J, Bohner D: Cauda equina syndrome after continuous spinal anesthesia. *Anesth Analg* 1991; 72:275-81
6. Schell RM, Brauer FS, Cole DJ, Applegate RL II: Persistent sacral nerve root deficits after continuous spinal anaesthesia. *Can J Anaesth* 1991; 38:908-11
7. Lambert LA, Lambert DH, Strichartz GR: Irreversible conduction block in isolated nerve by high concentrations of local anesthetics. *ANESTHESIOLOGY* 1994; 80:1082-93
8. Concepcion MA, Lambert DH, Welch KA, Covino BG: Tourniquet pain during spinal anesthesia: A comparison of plain solutions of tetracaine and bupivacaine. *Anesth Analg* 1988; 67:828-32

(Accepted for publication March 20, 1998.)
